# Supplementary material
Source: PubMed Central journal article supplement (PMC2785334)
Supplement: supp_M109.030668_Suppdata.pdf [file supp_M109.030668_Suppdata.pdf]

## Supporting Figure 1

**A**

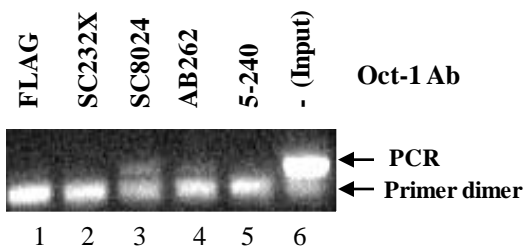

**B**

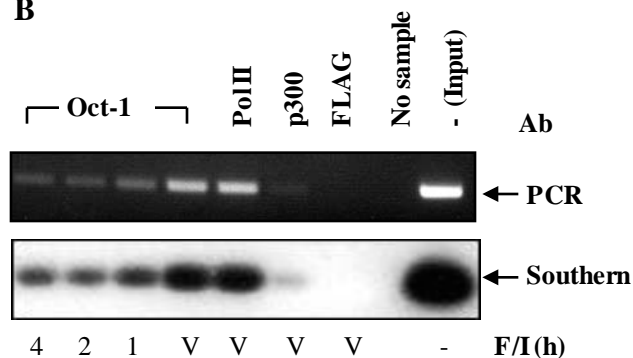

## Supporting Figure legends

**Figure S1. Establishment of ChIP assay (A)** A representative ChIP result shows that two of the four Oct-1 antibodies we have tested (SC8024 from Santa Cruz Biotechnology Inc., and AB9262 from Upstate Biotechnology) precipitated chromatin DNA that contains Cdx-2pOCT. Two other oct-1 antibodies (05-240 from Upstate biotechnology and SC232X, from Cruz Biotechnology Inc.) did not. FLAG is a control antibody. **(B)** A representative ChIP result shows that Forskolin/IBMX (F/I, 10 mM each) reduced the amount of Cdx-2pOCT containing genomic DNA precipitated by Oct-1 antibody (SC8024).
